# Supplementary material for: Increased Expression of KNSTRN in Lung Adenocarcinoma Predicts Poor Prognosis: A Bioinformatics Analysis Based on TCGA Data
Source: PubMed Central journal article supplement (PMC8100810; doi:10.7150/jca.51591), 2021-04-02

**Supplementary Figure 1.** (A) Mutations of *KNSTRN* gene in 586 patients with lung adenocarcinoma from TCGA (Firehose Legacy) were verified in the cBioPortal database (<http://www.cbioportal.org/>), and 4% of lung adenocarcinoma patients were found to have *KNSTRN* mutations. (B) The GEPIA database (<http://gepia.cancer-pku.cn/>) was used to analyze the distribution of *KNSTRN* in human tissues and the expression changes in tumors. (C) The expression of *KNSTRN* in different cancers was analyzed in GEPIA database. (D) The OS analysis was verified in the GEPIA database. (E) The OS analysis was verified in the KM Plotter database (<http://kmplot.com/analysis/>). (F) The OS analysis was verified in the GEO database (Data set: GSE72094 [<https://www.ncbi.nlm.nih.gov/geo/query/acc.cgi?acc=GSE72094>]). (G) Protein-protein interaction plot of the correlation of *KNSTRN* and potentially related genes.

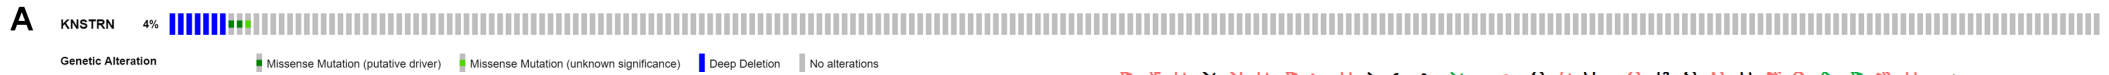

**B** The median expression of tumor and normal samples in bodymap

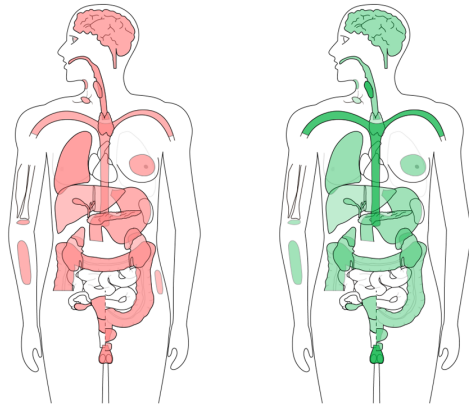

Log<sub>2</sub>(TPM + 1) Scale

**C**

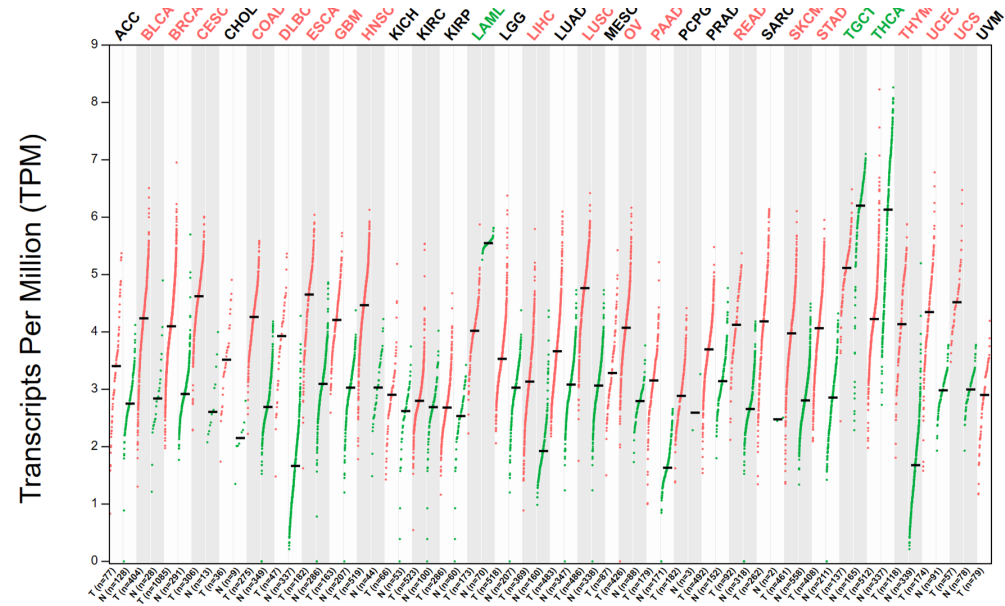

**D**

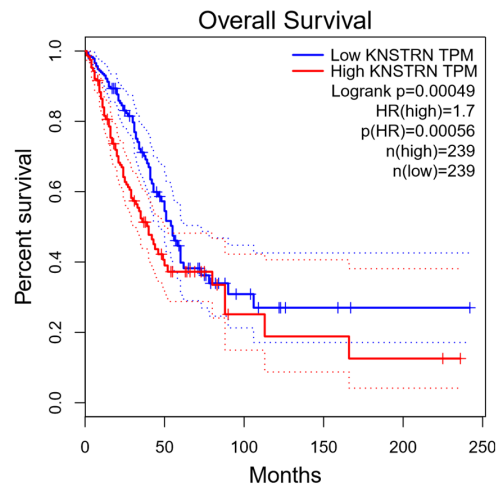

**E**

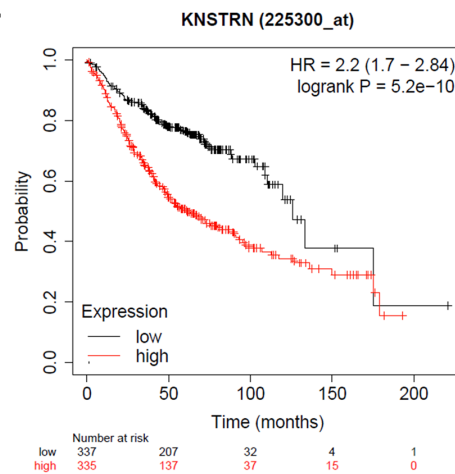

**F**

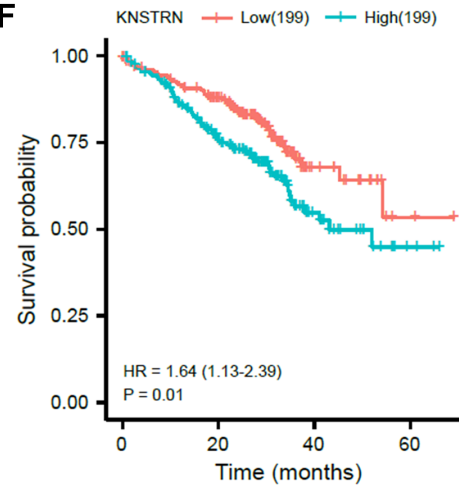

**G**

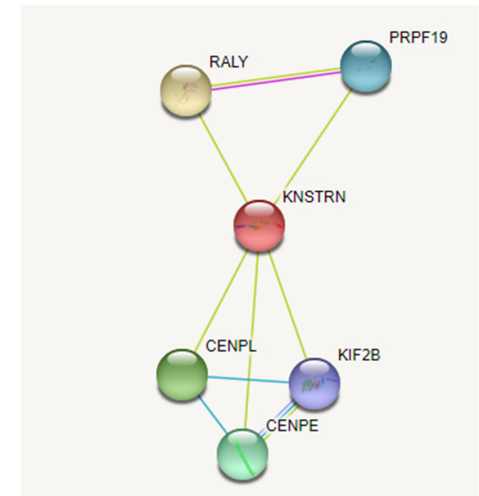

Supplement: jcav12p3239s1.pdf [file jcav12p3239s1.pdf]
